# Supplementary material
Source: publisher figshare collection journal article supplement (https://acs.figshare.com/ndownloader/files/8643154)
Supplement: Supplementary file 1 [file 8643154]

## **Supporting Information**

### **Atomic Layer Deposition of Tin Oxide Using Tributyltin Ethoxide with Ozone**

Charith E. Nanayakkara<sup>†</sup>, Guo Liu<sup>‡</sup>, Abraham Vega<sup>†</sup>, Charles L. Dezelah<sup>‡</sup>, Ravindra K.

Kanjolia<sup>‡</sup>, Yves J. Chabal<sup>†</sup>

<sup>†</sup>Department of Materials Science & Engineering, The University of Texas at Dallas,

Richardson, Texas 75080, United States

<sup>‡</sup>EMD Performance Materials, 1429 Hilldale Avenue, Haverhill, MA, 01832, United

States

**Figure S1:** Thermogravimetric analysis of tributyltin ethoxide.

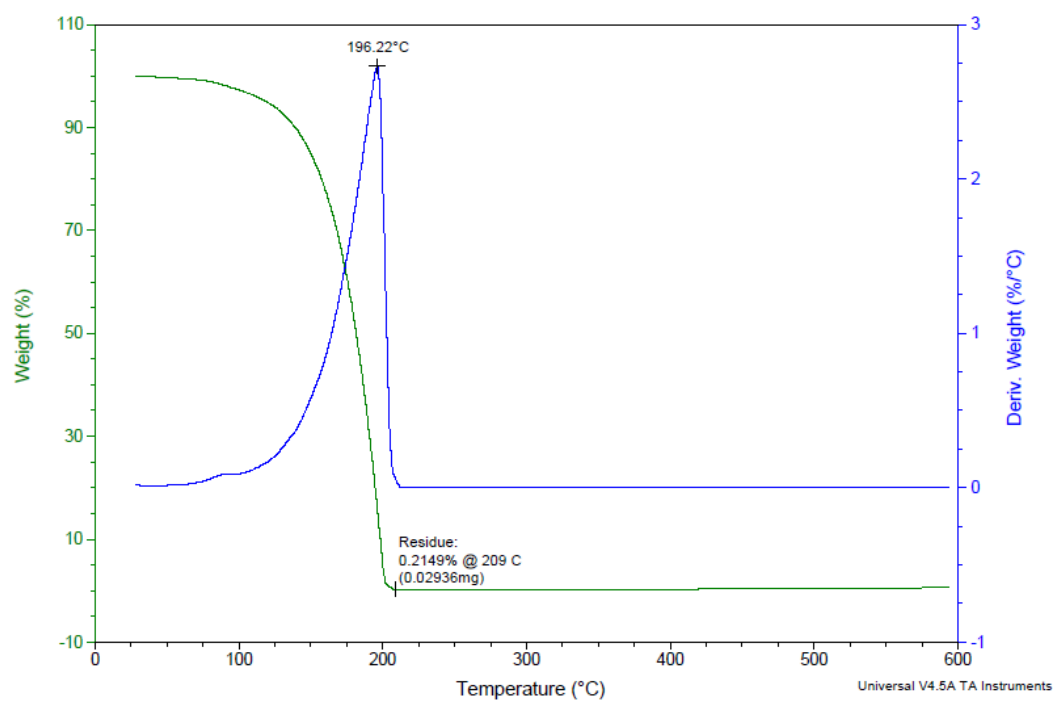

**Figure S2:** Differential infrared absorbance spectrum obtained by referencing the spectrum after the 400 °C pre-anneal to the initial OH-terminated SiO<sub>2</sub>-passivated Si(111) surface.

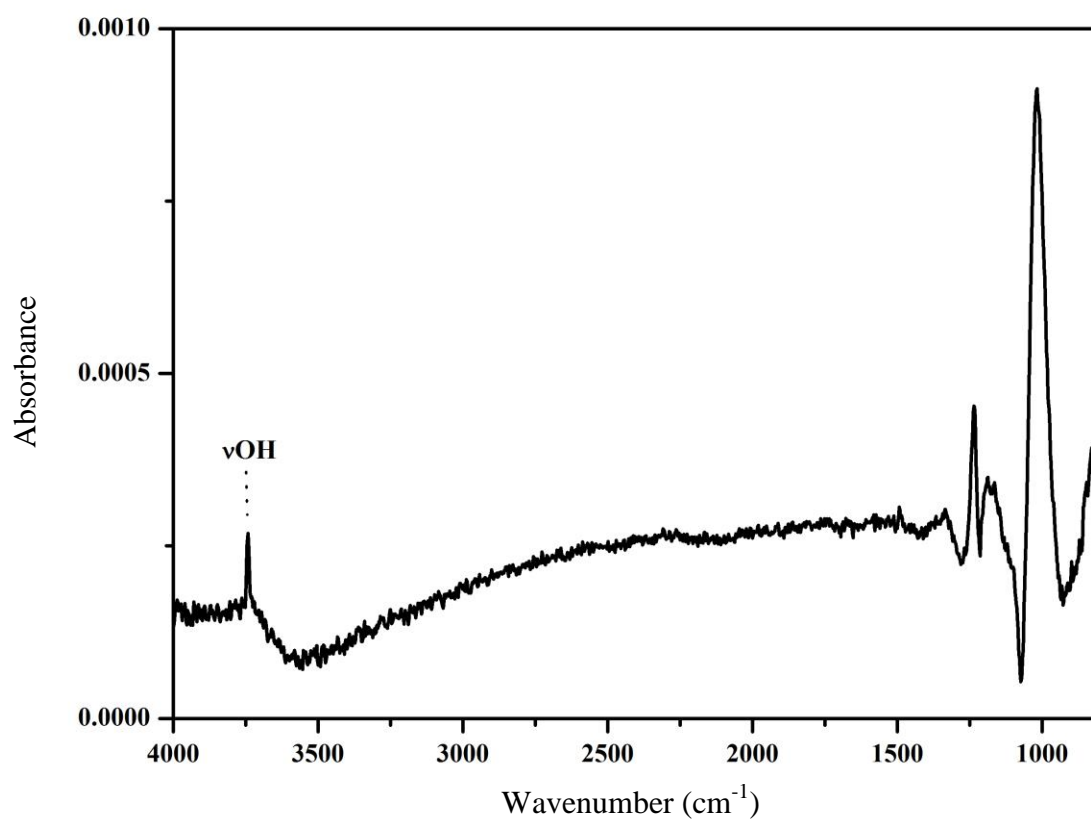

**Figure S3:** C-H stretching bands region of the differential infrared absorbance spectra during the 1<sup>st</sup>, 2<sup>nd</sup> and 20<sup>th</sup> ALD cycles at 200 °C with tributyltin ethoxide (n<sup>th</sup> Sn) and ozone (n<sup>th</sup> O<sub>3</sub>) (Concentration = 250 g/Nm<sup>3</sup>, flow = 100 sccm, with 60 s pulse with 60 s trapping), on OH-terminated SiO<sub>2</sub> on Si (111) referenced to each preceding treatment.

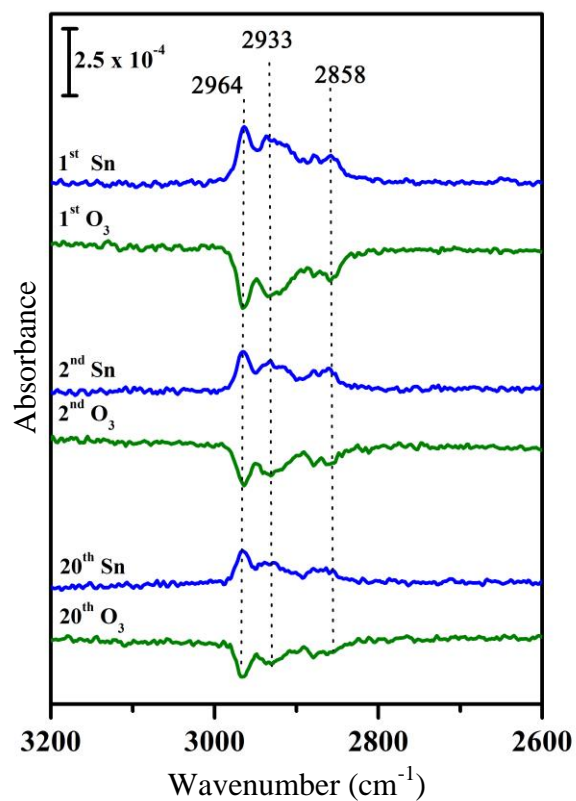

**Figure S4:** Differential infrared absorbance spectra during the first two ALD cycles at 300°C with tributyltin ethoxide ( $n^{\text{th}}$  Sn) and ozone ( $n^{\text{th}}$  O<sub>3</sub>) (Concentration = 250 g/Nm<sup>3</sup>, flow = 100 sccm, with 60 s exposure with 60 s trapping.), on OH-terminated SiO<sub>2</sub> on Si (111) referenced to each preceding treatment. (C: carbonate and F: formate). The spectra in the right hand side panel were multiplied by 2 to clearly see the features.

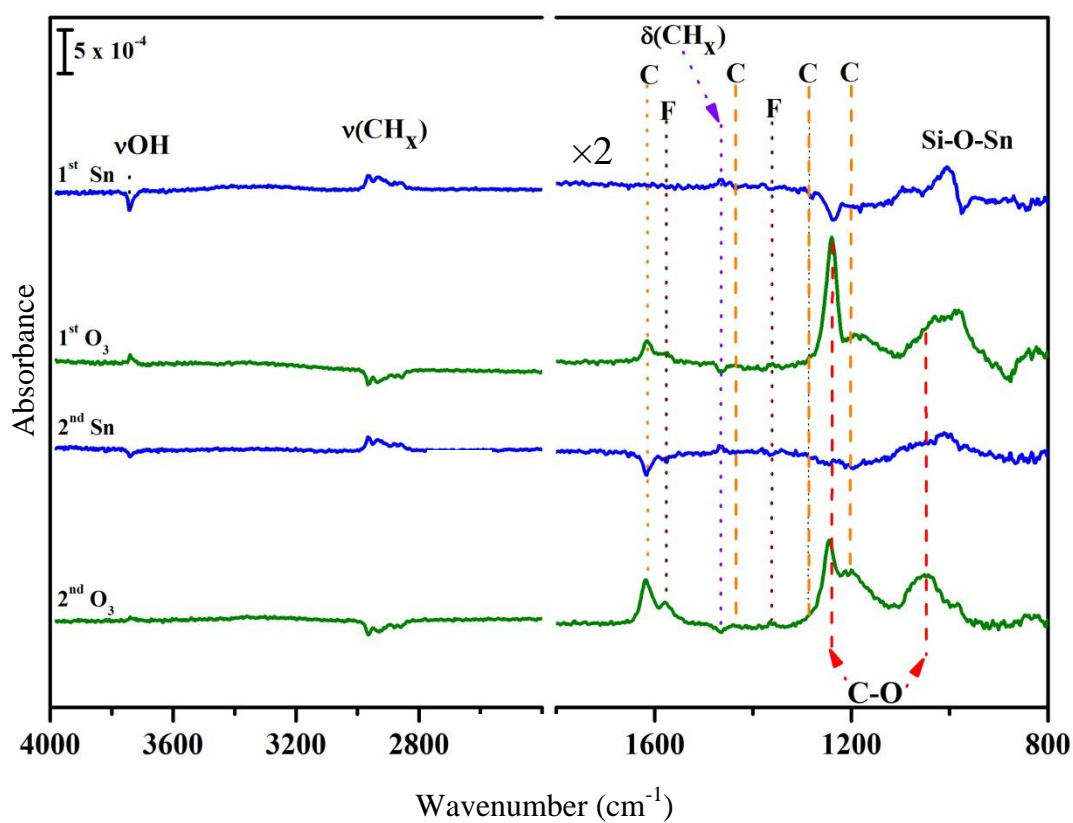

**Figure S5:** XPS depth profiles of the ALD grown  $\text{SnO}_x$  films at 300 °C with tributyltin ethoxide and ozone (Concentration = 250 g/Nm<sup>3</sup>, flow = 100 sccm, with 60 s exposure with 60 s trapping) on OH-terminated  $\text{SiO}_2$  on Si (111) (20 cycles).

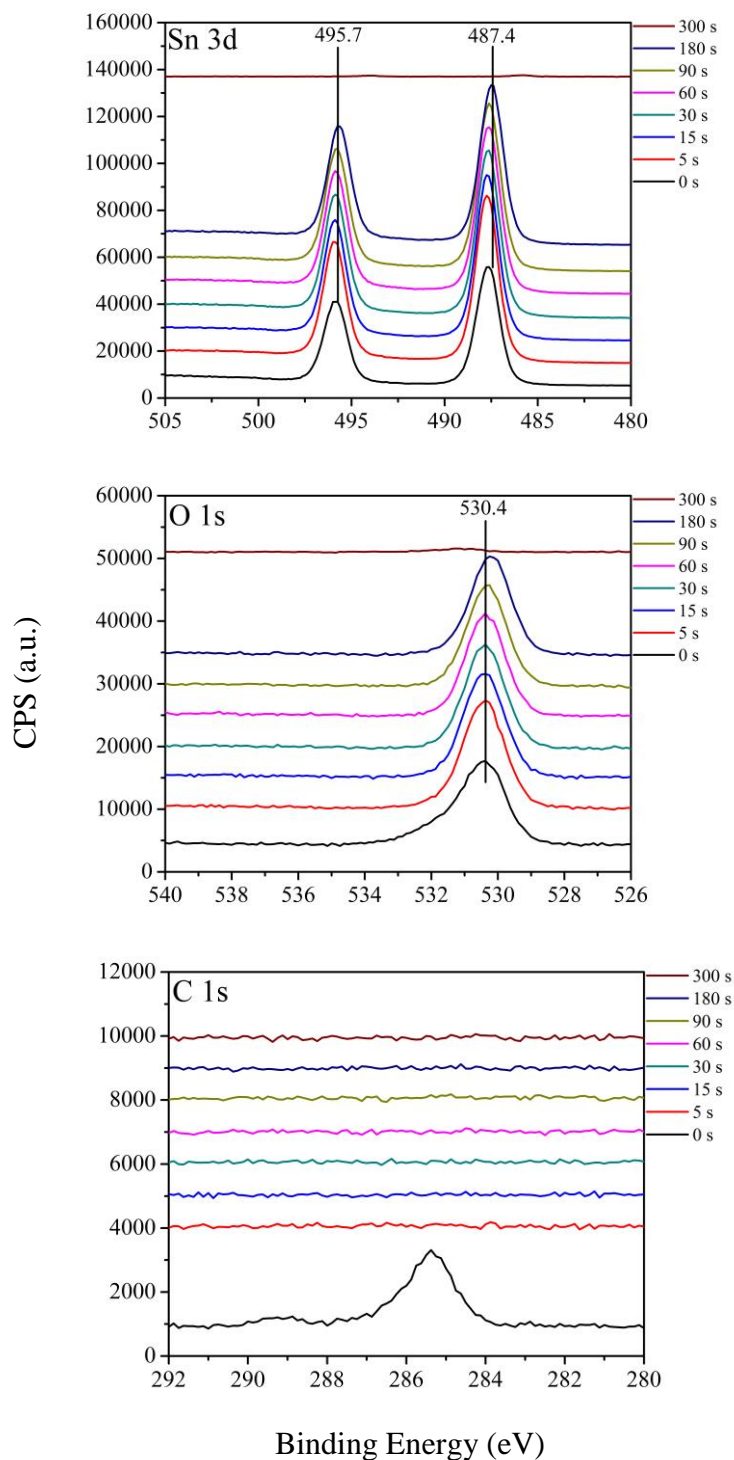

**Figure S6:** Precursor saturation at 225 °C and 268 °C using 2 s tributyltin ethoxide and 5 s ozone exposures using the cross flow reactor. Inlet- film grown closer to the precursor inlet to the reactor and Outlet – film grown closer to the precursor outlet of the reactor.

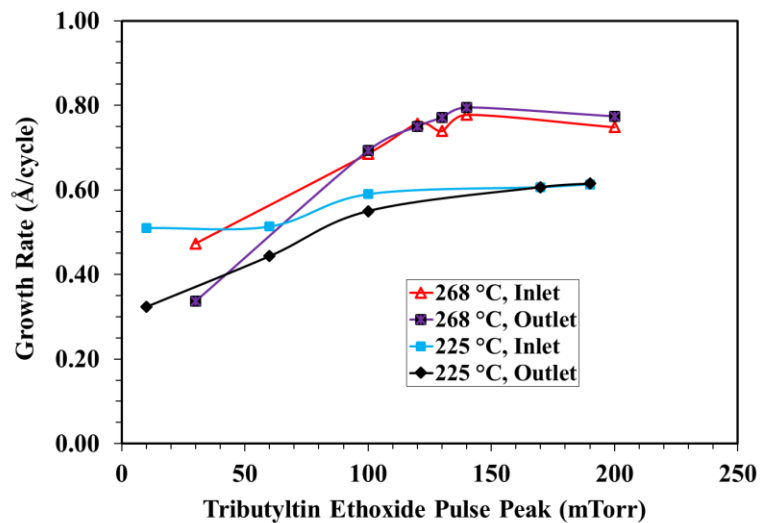

**Figure S7:** Electrical resistivity of SnOx films as a function of the deposition temperature from 200 °C to 300 °C using 2 s tributyltin ethoxide and 5 s ozone exposures using the cross flow reactor. Inlet - film grown closer to the precursor inlet to the reactor and Outlet - film grown closer to the precursor outlet of the reactor.

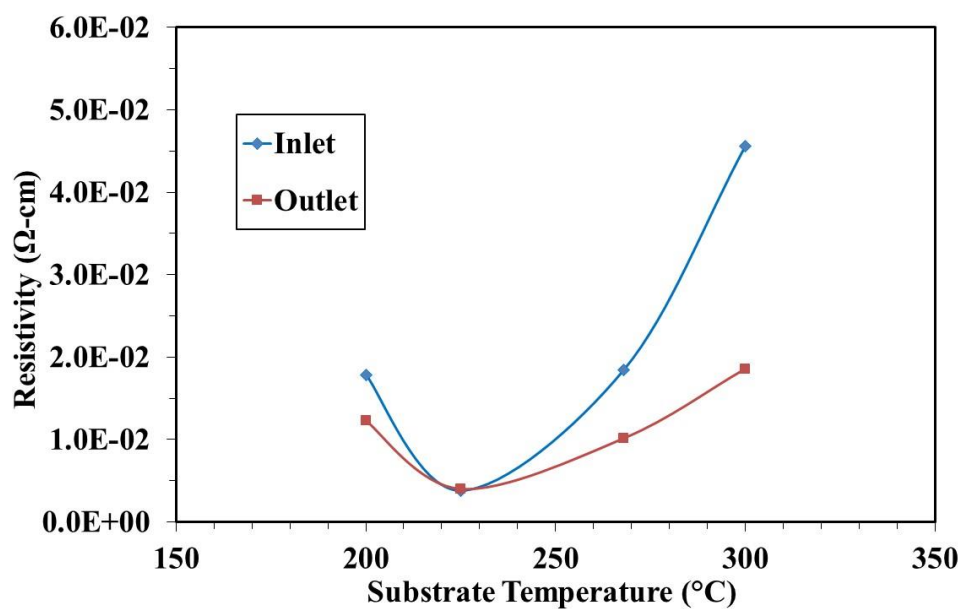



**Figure S8:** Electrical resistivity of SnO<sub>x</sub> films deposited at 225 °C using 2 s tributyltin ethoxide and 5 s ozone exposures as a function of SnO<sub>x</sub> film thickness using the cross flow reactor. Inlet - film grown closer to the precursor inlet to the reactor and Outlet - film grown closer to the precursor outlet of the reactor.

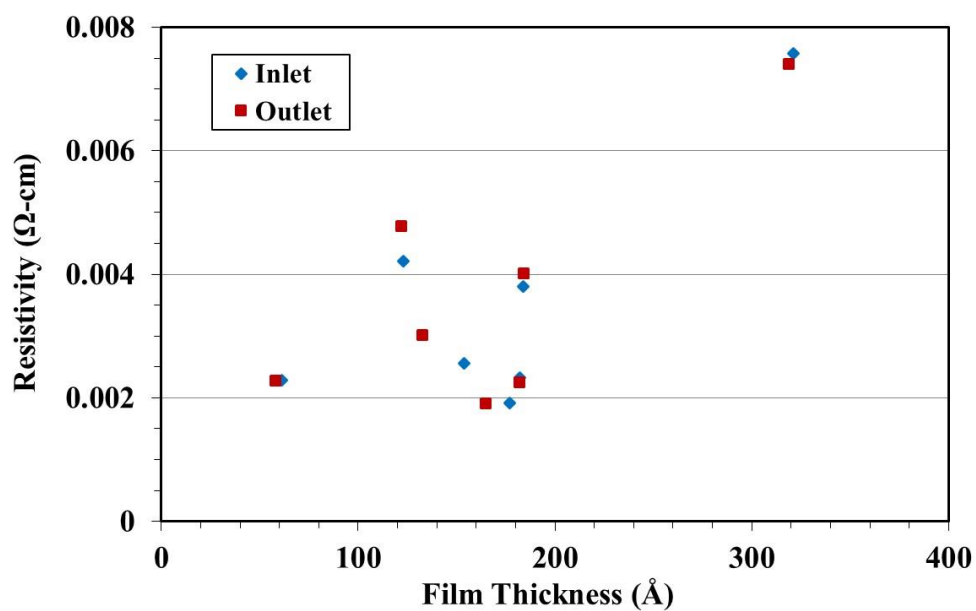

**Table S1:** Standard process recipe for film deposition using a cross-flow reactor.

| Parameter                                   | Value                |
|---------------------------------------------|----------------------|
| Tributyltin ethoxide pulse                  | 2 s                  |
| Purge time after tributyltin ethoxide pulse | 5 s                  |
| Ozone pulse                                 | 5 s                  |
| Purge time after ozone pulse                | 10 s                 |
| Ozone concentration                         | 200 g/m <sup>3</sup> |
| Ozone flow rate                             | 300 sccm             |
